# Supplementary material for: Benchmarking AutoML frameworks for disease prediction using medical claims
Source: PubMed Central journal article supplement (PMC9327416; doi:10.1186/s13040-022-00300-2), 2022-07-26
Supplement: 13040_2022_300_MOESM1_ESM.pdf [file 13040_2022_300_MOESM1_ESM.pdf]

# Additional File for Benchmarking AutoML Frameworks for Disease Prediction Using Medical Claims

Full list of author information is available at the end of the article

## Figures

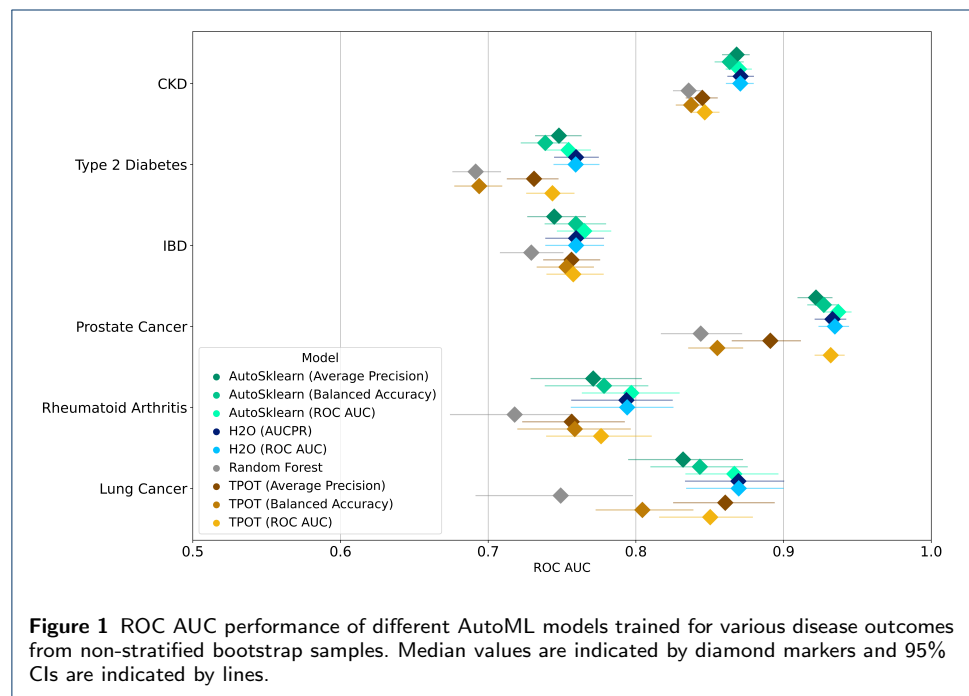

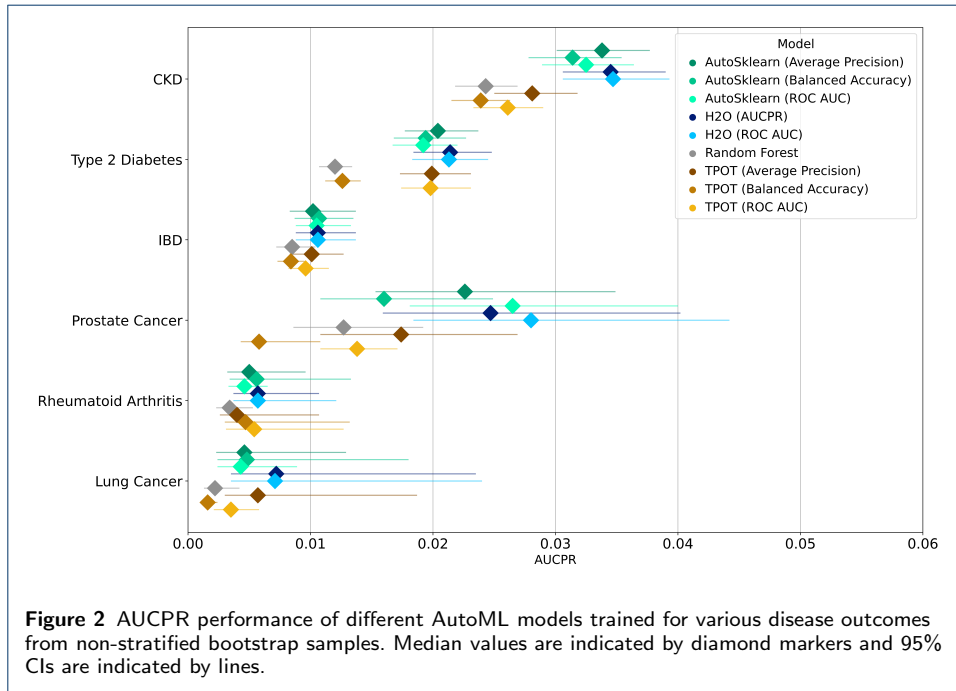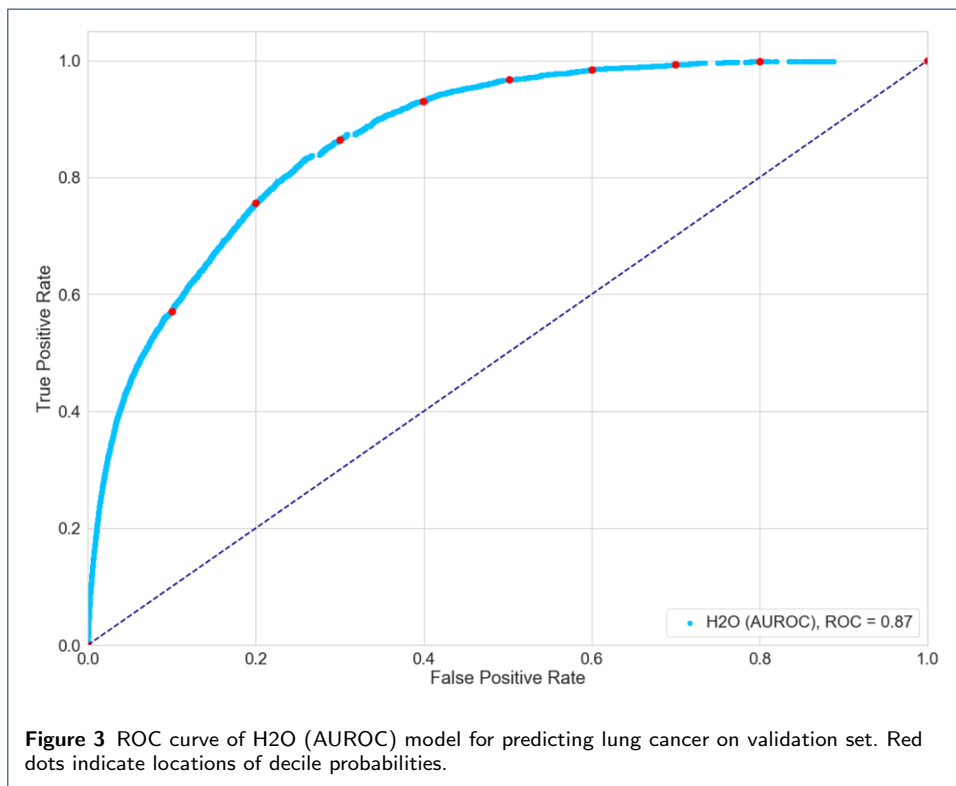

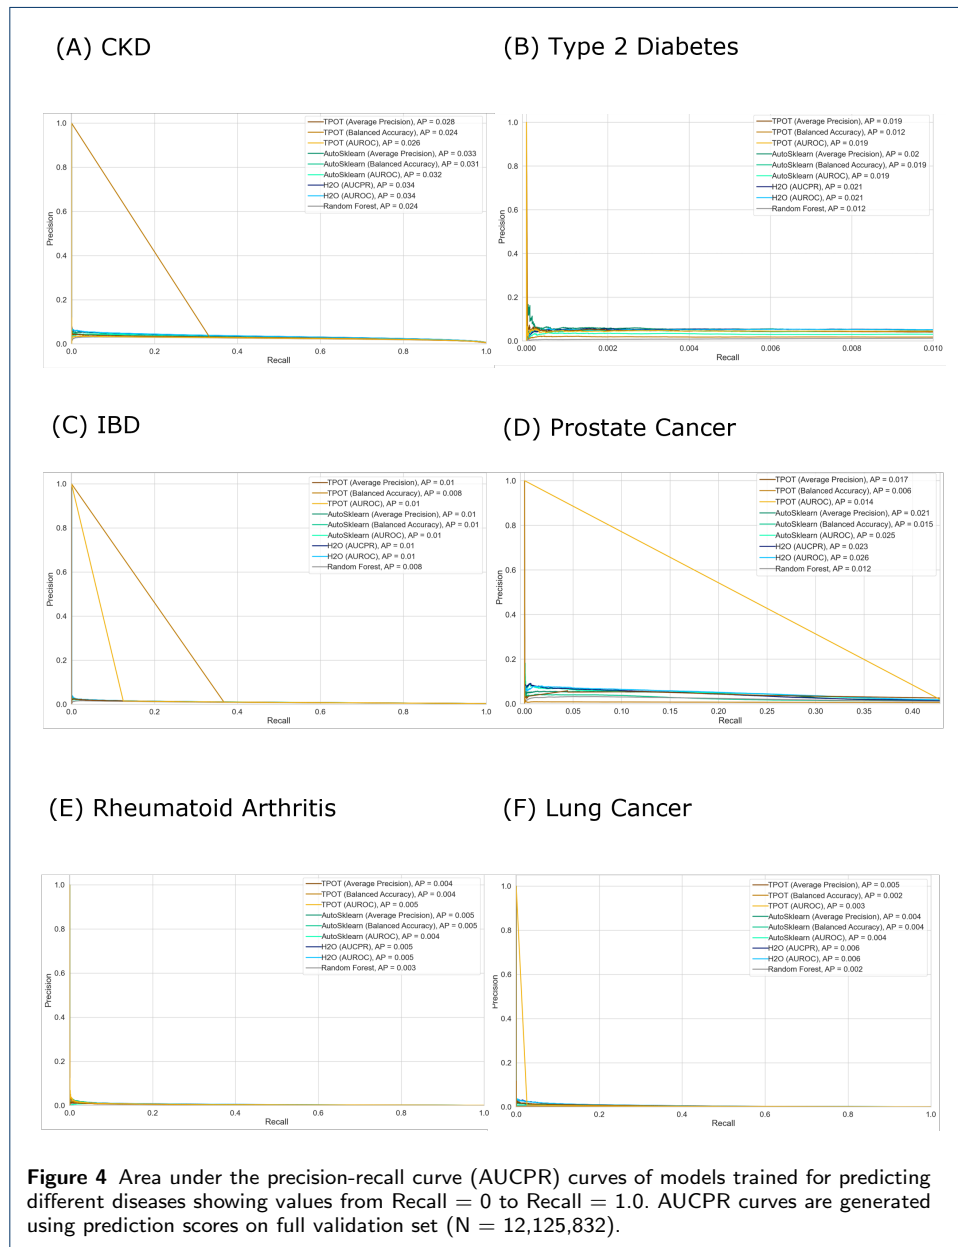

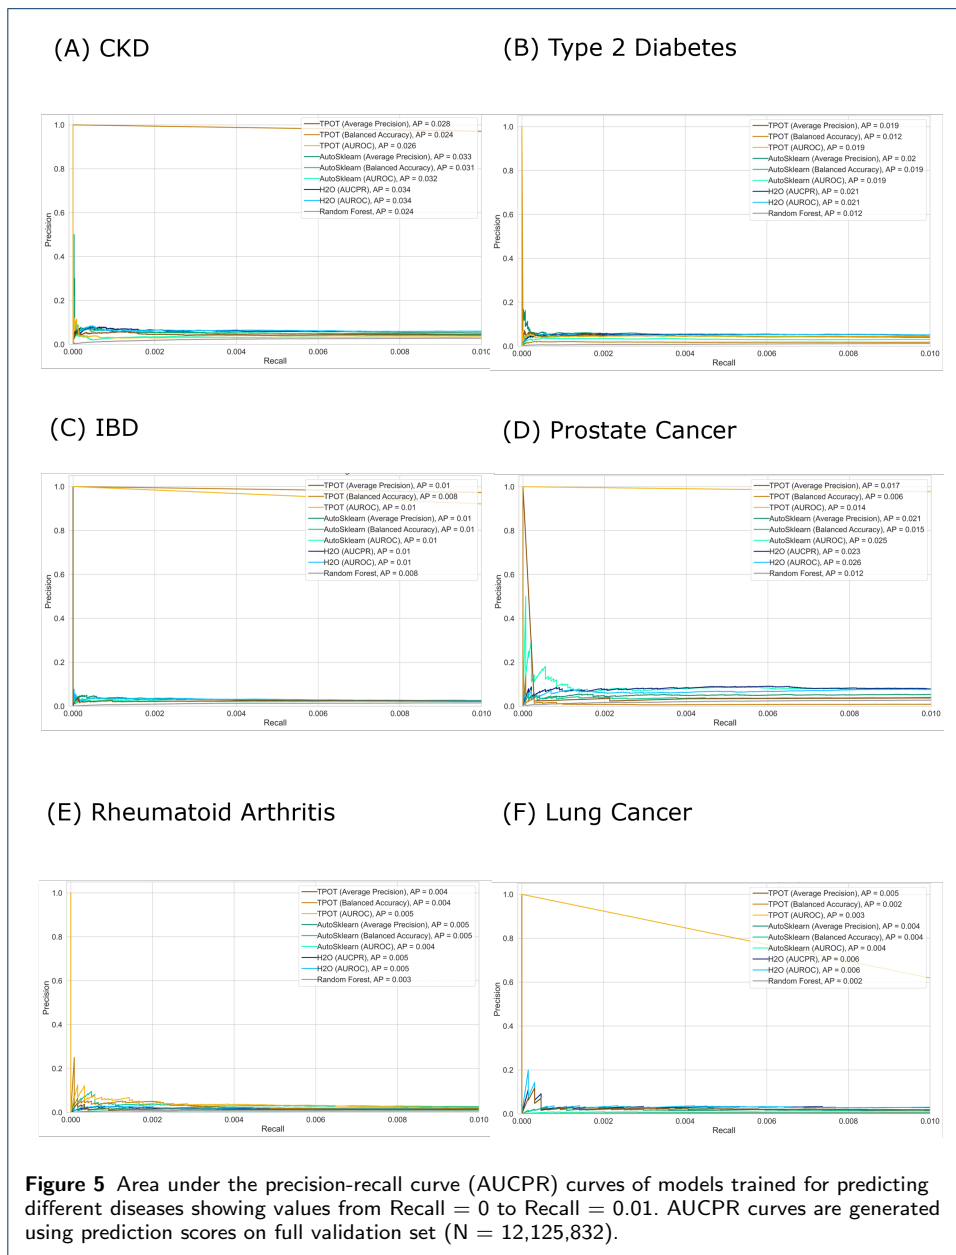

Tables

|                         | AutoSklearn<br>(Average Precision) | AutoSklearn<br>(Balanced Accuracy) | AutoSklearn<br>(ROC AUC)                 | H2O<br>(AUC)                             | H2O<br>(AUCPR)                           | TPOT<br>(Average Precision) | TPOT<br>(Balanced Accuracy) | TPOT<br>(ROC AUC)          | Random<br>Forest           |
|-------------------------|------------------------------------|------------------------------------|------------------------------------------|------------------------------------------|------------------------------------------|-----------------------------|-----------------------------|----------------------------|----------------------------|
| CKD                     | 0.8685<br>(0.8604, 0.876)          | 0.8638<br>(0.855, 0.8721)          | 0.8702<br>(0.8623, 0.8782)               | 0.8712<br>(0.8632, 0.879)                | <b>0.8714</b><br><b>(0.8631, 0.8794)</b> | 0.8455<br>(0.8347, 0.8555)  | 0.8374<br>(0.8279, 0.8475)  | 0.847<br>(0.8382, 0.8562)  | 0.8358<br>(0.8257, 0.8455) |
| Type 2<br>Diabetes      | 0.7466<br>(0.7307, 0.7623)         | 0.7382<br>(0.7212, 0.7526)         | 0.7538<br>(0.7385, 0.769)                | <b>0.7585</b><br><b>(0.7425, 0.7725)</b> | 0.7584<br>(0.743, 0.7728)                | 0.7295<br>(0.7112, 0.7462)  | 0.6926<br>(0.6752, 0.7087)  | 0.7425<br>(0.7252, 0.7582) | 0.6907<br>(0.6753, 0.7064) |
| IBD                     | 0.745<br>(0.7239, 0.7646)          | 0.7597<br>(0.7385, 0.7775)         | 0.7642<br>(0.7446, 0.7825)               | <b>0.7593</b><br><b>(0.7399, 0.7773)</b> | <b>0.7593</b><br><b>(0.7399, 0.7773)</b> | 0.7563<br>(0.7381, 0.7746)  | 0.7522<br>(0.7341, 0.7702)  | 0.7578<br>(0.7373, 0.7763) | 0.729<br>(0.7068, 0.7495)  |
| Rheumatoid<br>Arthritis | 0.7699<br>(0.7346, 0.8087)         | 0.7771<br>(0.7433, 0.8143)         | 0.7974<br>(0.7629, 0.8288)               | <b>0.7952</b><br><b>(0.7588, 0.8275)</b> | 0.7948<br>(0.7576, 0.8275)               | 0.7578<br>(0.7213, 0.7931)  | 0.7599<br>(0.7236, 0.7961)  | 0.7788<br>(0.7416, 0.8118) | 0.7184<br>(0.6714, 0.7579) |
| Prostate<br>Cancer      | 0.9213<br>(0.9088, 0.9323)         | 0.9266<br>(0.9166, 0.9366)         | <b>0.9369</b><br><b>(0.9254, 0.9463)</b> | 0.9347<br>(0.9233, 0.9448)               | 0.9328<br>(0.9216, 0.9425)               | 0.8897<br>(0.8627, 0.9094)  | 0.8553<br>(0.8378, 0.8739)  | 0.9315<br>(0.9202, 0.9415) | 0.8447<br>(0.814, 0.8721)  |
| Lung<br>Cancer          | 0.8325<br>(0.7877, 0.8725)         | 0.8448<br>(0.8075, 0.8757)         | 0.8665<br>(0.8333, 0.8996)               | <b>0.8712</b><br><b>(0.8366, 0.9067)</b> | 0.8711<br>(0.8365, 0.9071)               | 0.8602<br>(0.8261, 0.8933)  | 0.8085<br>(0.7726, 0.8394)  | 0.8485<br>(0.8155, 0.886)  | 0.7519<br>(0.7003, 0.8124) |

Table 1 Median ROC AUC performance (95% CI) of different AutoML models determined from stratified bootstrap samples of predictions on the validation set. Models with the best performance for each disease are indicated in bold.

|                         | AutoSklearn<br>(Average Precision) | AutoSklearn<br>(Balanced Accuracy) | AutoSklearn<br>(ROC AUC)   | H2O<br>(AUC)                             | H2O<br>(AUCPR)                           | TPOT<br>(Average Precision) | TPOT<br>(Balanced Accuracy) | TPOT<br>(ROC AUC)          | Random<br>Forest           |
|-------------------------|------------------------------------|------------------------------------|----------------------------|------------------------------------------|------------------------------------------|-----------------------------|-----------------------------|----------------------------|----------------------------|
| CKD                     | 0.0338<br>(0.0309, 0.038)          | 0.0316<br>(0.0289, 0.0352)         | 0.0325<br>(0.0296, 0.0359) | <b>0.0347</b><br><b>(0.0317, 0.0384)</b> | 0.0345<br>(0.0315, 0.0386)               | 0.0282<br>(0.0257, 0.0314)  | 0.0239<br>(0.0223, 0.0256)  | 0.0261<br>(0.0239, 0.029)  | 0.0243<br>(0.0223, 0.0264) |
| Type 2<br>Diabetes      | 0.0201<br>(0.0174, 0.0231)         | 0.0193<br>(0.0167, 0.0221)         | 0.0191<br>(0.0171, 0.0216) | 0.021<br>(0.0185, 0.0244)                | 0.0212<br><b>(0.0186, 0.0246)</b>        | 0.0198<br>(0.0172, 0.0226)  | 0.0124<br>(0.0113, 0.0138)  | 0.0198<br>(0.0173, 0.0224) | 0.012<br>(0.0109, 0.013)   |
| IBD                     | 0.0103<br>(0.0086, 0.0131)         | 0.0107<br>(0.009, 0.0138)          | 0.0105<br>(0.009, 0.013)   | 0.0107<br><b>(0.009, 0.0135)</b>         | 0.0107<br><b>(0.009, 0.0135)</b>         | 0.0102<br>(0.0086, 0.0124)  | 0.0083<br>(0.0075, 0.0092)  | 0.0096<br>(0.0085, 0.0111) | 0.0085<br>(0.0074, 0.0099) |
| Rheumatoid<br>Arthritis | 0.005<br>(0.0033, 0.0094)          | 0.0056<br>(0.0036, 0.0129)         | 0.0046<br>(0.0035, 0.0062) | 0.0058<br><b>(0.004, 0.0105)</b>         | 0.0058<br><b>(0.004, 0.0103)</b>         | 0.0039<br>(0.0027, 0.0087)  | 0.0045<br>(0.003, 0.0116)   | 0.0053<br>(0.0034, 0.0136) | 0.0034<br>(0.0023, 0.0052) |
| Prostate<br>Cancer      | 0.0227<br>(0.0155, 0.0324)         | 0.016<br>(0.0114, 0.0242)          | 0.0267<br>(0.0181, 0.0396) | <b>0.0281</b><br><b>(0.0189, 0.0415)</b> | 0.0249<br>(0.0168, 0.038)                | 0.0171<br>(0.0114, 0.025)   | 0.0088<br>(0.0047, 0.0107)  | 0.0138<br>(0.0113, 0.0165) | 0.0127<br>(0.009, 0.0182)  |
| Lung<br>Cancer          | 0.0045<br>(0.0024, 0.0122)         | 0.0047<br>(0.0025, 0.0149)         | 0.0043<br>(0.0026, 0.0084) | 0.0074<br><b>(0.0038, 0.0216)</b>        | <b>0.0075</b><br><b>(0.0038, 0.0211)</b> | 0.0059<br>(0.0032, 0.0189)  | 0.0016<br>(0.0012, 0.0023)  | 0.0035<br>(0.0023, 0.0058) | 0.0023<br>(0.0014, 0.0041) |

Table 2 Median AUCPR performance (95% CI) of different AutoML models determined from stratified bootstrap samples of predictions on the validation set. Models with the best performance for each disease are indicated in bold.

| Percentile | Threshold | TN       | FP       | FN   | TP   | FPR   | TPR   |
|------------|-----------|----------|----------|------|------|-------|-------|
| 10         | 0.000050  | 1332     | 12118119 | 0    | 6381 | 1.000 | 1.000 |
| 20         | 0.000063  | 2420542  | 9698909  | 13   | 6368 | 0.800 | 0.998 |
| 30         | 0.000076  | 3637704  | 8481747  | 46   | 6335 | 0.700 | 0.993 |
| 40         | 0.000100  | 4850231  | 7269220  | 101  | 6280 | 0.600 | 0.984 |
| 50         | 0.000148  | 6038573  | 6080878  | 211  | 6170 | 0.502 | 0.967 |
| 60         | 0.000247  | 7275056  | 4844395  | 443  | 5938 | 0.400 | 0.931 |
| 70         | 0.000412  | 8486907  | 3632544  | 868  | 5513 | 0.300 | 0.864 |
| 80         | 0.000627  | 9699105  | 2420346  | 1559 | 4822 | 0.200 | 0.756 |
| 90         | 0.001109  | 10910511 | 1208940  | 2737 | 3644 | 0.100 | 0.571 |
| 100        | 0.061339  | 12119450 | 1        | 6381 | 0    | 0.000 | 0.000 |

**Table 3** Confusion matrices for H2O (AUROC) model for predicting lung cancer for thresholds set at decile values of validation set prediction probabilities.
